# Supplementary material for: Reverse Osmosis with Intermediate Chemical Demineralization: Scale Inhibitor Selection, Degradation, and Seeded Precipitation
Source: MDPI journal article supplement (doi:10.3390/molecules29102163), 2024-05-07
Supplement: s1 [file s1]

## Support Information

### Reverse Osmosis with Intermediate Chemical Demineralization: Scale Inhibitor Selection, Degradation and Seeded Precipitation

Shichang Xu <sup>1</sup>, Ping Wang <sup>1</sup>, Lixin Xie <sup>1,\*</sup>, Yawei Du <sup>2</sup> and Wen Zhang <sup>1,\*</sup>

<sup>1</sup> Tianjin Key Laboratory of Membrane Science and Desalination Technology, State Key Laboratory of Chemical Engineering, School of Chemical Engineering and Technology, Tianjin University, Tianjin 300350, China; xu\_sc1@tju.edu.cn (S.X.); pingwang\_971213@tju.edu.cn (P.W.)

<sup>2</sup> School of Chemical Engineering and Technology, Hebei University of Technology, Tianjin 300401, China; sonicduyawei001@126.com

\* Correspondence: xie\_lixin@tju.edu.cn (L.X.); zhang\_wen@tju.edu.cn (W.Z.)

Table number 2, Figure number 3

**Table S1** Ratio of residual scale inhibitor (R) after the UVD stage for different operating conditions

| Exp. No. | Scale inhibitor | UV intensit | H <sub>2</sub> O <sub>2</sub> (mg/L) | t <sub>p</sub> (mi | Loading mount | Seeds particle | R    |
|----------|-----------------|-------------|--------------------------------------|--------------------|---------------|----------------|------|
| PBL      | -               | -           | -                                    | -                  | 2.5           | 7-43           | 0    |
| NBL      | 10              | -           | -                                    | -                  | 2.5           | 7-43           | 1    |
| (1)      | 10              | 20          | 70                                   | 15                 | 2.5           | 7-43           | 0.03 |
|          | 10              | 30          | 70                                   | 15                 | 2.5           | 7-43           | 0.02 |
|          | 10              | 40          | 70                                   | 15                 | 2.5           | 7-43           | 0    |
| (2)      | 10              | 40          | 70                                   | 15                 | 2.5           | 7-43           | 0    |
|          | 10              | 40          | 40                                   | 15                 | 2.5           | 7-43           | 0.01 |
|          | 10              | 40          | 10                                   | 15                 | 2.5           | 7-43           | 0.07 |
| (3)      | 10              | 20          | 70                                   | 15                 | 2.5           | 7-43           | 0.03 |
|          | 10              | 20          | 70                                   | 20                 | 2.5           | 7-43           | 0    |
|          | 10              | 20          | 70                                   | 25                 | 2.5           | 7-43           | 0    |
| (4)      | 10              | 20          | 70                                   | 30                 | 2.5           | 7-43           | 0    |
|          | 10              | 20          | 70                                   | 15                 | 2.5           | 7-43           | 0.03 |
|          | 10              | 20          | 70                                   | 15                 | 2.5           | 43-71          | 0.03 |
| (5)      | 10              | 20          | 70                                   | 15                 | 2.5           | 71-91          | 0.03 |
|          | 10              | 20          | 70                                   | 15                 | 1.5           | 7-43           | 0.03 |
|          | 10              | 20          | 70                                   | 15                 | 2.5           | 7-43           | 0.03 |
| (6)      | 10              | 20          | 70                                   | 15                 | 3.5           | 7-43           | 0.03 |
|          | 10              | 20          | 70                                   | 15                 | 5.5           | 7-43           | 0.03 |
|          | 10              | 40          | 70                                   | 15                 | 2.5           | 7-43           | 0    |
| (6)      | 10              | 40          | 70                                   | 15                 | 2.5           | from           | 0    |
|          | 10              | 40          | 70                                   | 15                 | 2.5           | from H2        | 0    |
|          | 10              | 40          | 70                                   | 15                 | 2.5           | from H3        | 0    |

**Table S2** Composition of model concentrates with different gypsum saturation indices<sup>a</sup> K stands for the concentration ratio.

| salt                                 | CaCl <sub>2</sub><br>(mmol/L) | Na <sub>2</sub> SO <sub>4</sub><br>(mmol/L) | NaCl<br>(mmol/L) | pH   | SIg  |
|--------------------------------------|-------------------------------|---------------------------------------------|------------------|------|------|
| PRO concentrate<br>model solution(A) | 12.85                         | 20.7466                                     | 26.4016          | 6.70 | 0.70 |
| K <sup>a</sup> =1.5                  | 19.27                         | 31.12                                       | 39.60            | 6.70 | 1.16 |
| K=2.0                                | 25.69                         | 41.49                                       | 52.80            | 6.70 | 1.66 |
| K=2.5                                | 32.11                         | 51.87                                       | 66.00            | 6.70 | 2.19 |
| K=3.0                                | 38.54                         | 62.24                                       | 79.20            | 6.70 | 2.75 |
| K=3.5                                | 44.96                         | 72.61                                       | 92.41            | 6.70 | 3.34 |
| K=4.0                                | 51.38                         | 82.99                                       | 105.61           | 6.70 | 3.94 |
| K=4.5                                | 57.80                         | 93.36                                       | 118.81           | 6.70 | 4.57 |
| K=5.0                                | 64.23                         | 103.73                                      | 132.00           | 6.70 | 5.21 |
| K=5.5                                | 70.65                         | 114.10                                      | 145.21           | 6.70 | 5.87 |
| K=6.0                                | 77.07                         | 124.48                                      | 158.41           | 6.70 | 6.54 |
| K=6.5                                | 83.49                         | 134.85                                      | 171.61           | 6.70 | 7.23 |

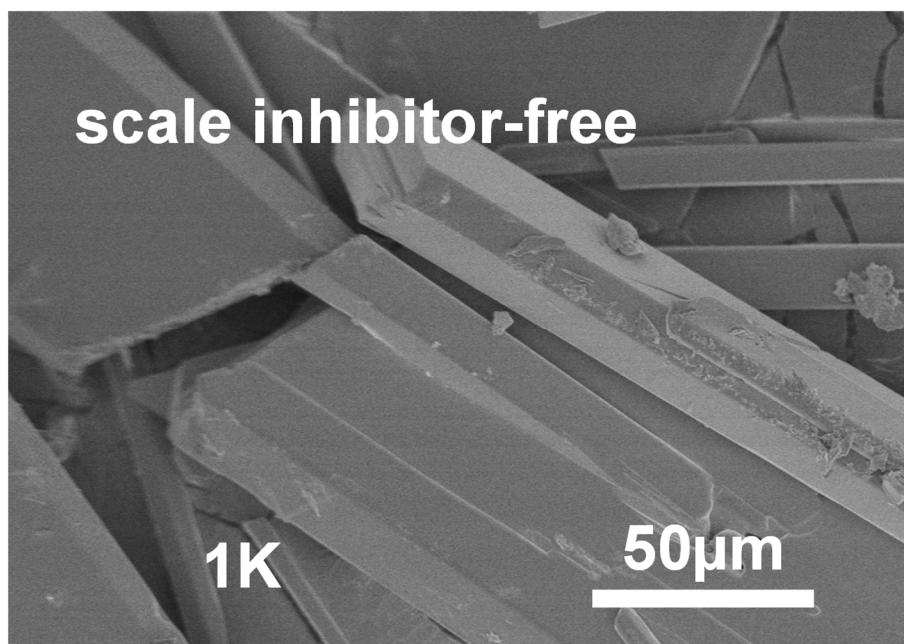

Figure S1 SEM images of scaling materials after 10h without scale inhibitor (SIg=6.5).

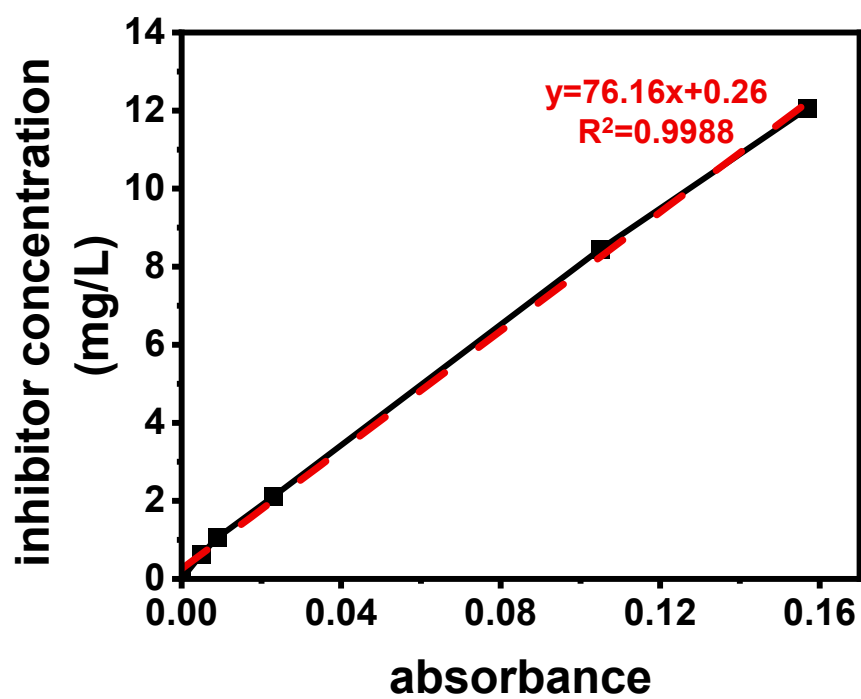

Figure S2 The standard curve of RO-400 concentration.

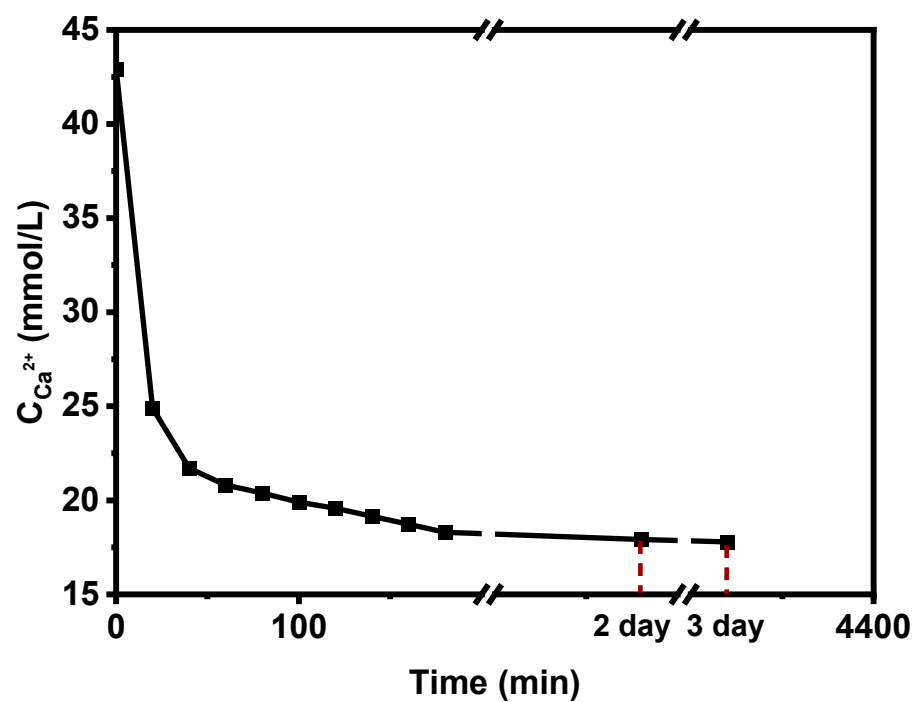

**Figure S3** Scale inhibitor-free calcium sulfate model solution C-bulk actual precipitation process ( $c_{3\text{ day}}$  considered as  $c_{eq}$ )
